# Supplementary material for: Development of Subunit Vaccines That Provide High-Level Protection and Sterilizing Immunity against Acute Inhalational Melioidosis
Source: PubMed Central journal article supplement (PMC5736816; doi:10.1128/iai.00724-17), 2017-12-19
Supplement: IAI.00724-17_zii999092270s1.pdf [file IAI.00724-17_zii999092270s1.pdf]

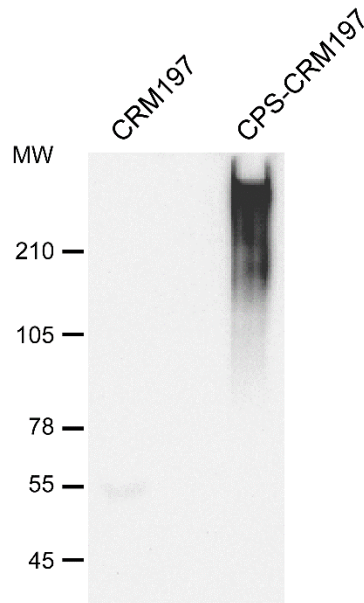

**FIG S1** Western immunoblot analysis of CPS-CRM197. CRM197 (control) and CPS-CRM197 were separated on a 4-20% Tris-HEPES gel and electrophoretically transferred to a nitrocellulose membrane. CPS was detected using the *B. pseudomallei* CPS-specific mAb, 3C5 (see Materials and Methods). The positions of the protein molecular standards (kDa) are indicated on the left.

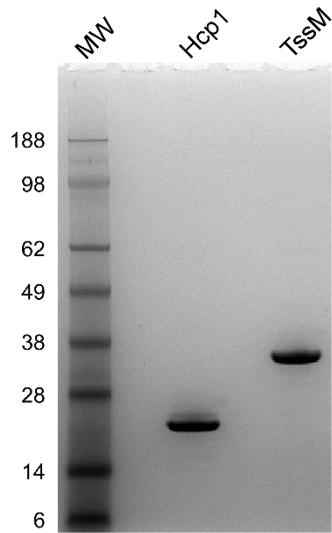

**FIG S2** SDS-PAGE analysis of recombinant *B. pseudomallei* Hcp1 and TssM antigens. Hcp1 and TssM were separated on a 4-12% Bis-Tris Bolt gel and visualized with Coomassie Blue R-250 (see Materials and Methods). The protein molecular standards (kDa) are indicated on the left.

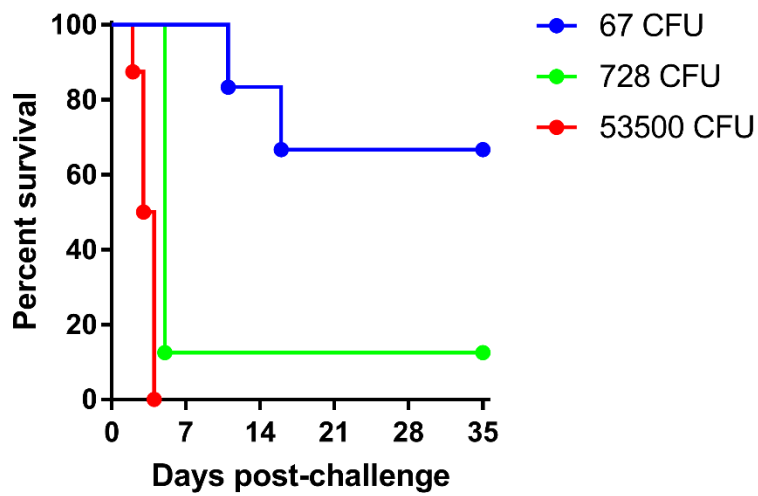

**FIG S3** Determination of the inhalational LD<sub>50</sub> of *B. pseudomallei* K96243 for C57BL/6 mice. Groups of 16-18 week-old, female C57BL/6 mice (n = 6 to 8 mice/group) were exposed to 67, 728 and 53,500 CFU of *B. pseudomallei* K96243 as previously described (see Materials and Methods). Mice were monitored for survival over 35 days and the LD<sub>50</sub> calculated.

**TABLE S1** Histopathological analysis of mouse tissues following a lethal inhalational challenge with *B. pseudomallei*.

| <b>Specimen Name</b> | <b>Grade*</b> | <b>Granulomas**</b> | <b>Lobar Pneumonia**</b> |
|----------------------|---------------|---------------------|--------------------------|
| Mouse 1 - Lung       | 0             | 0                   | No                       |
| Mouse 1 - Liver      | 0             | 0                   | -                        |
| Mouse 1 - Spleen     | 0             | 0                   | -                        |
| Mouse 2 - Lung       | 0             | 0                   | No                       |
| Mouse 2 - Liver      | 0             | 0                   | -                        |
| Mouse 2 - Spleen     | 0             | 0                   | -                        |
| Mouse 3 - Lung       | 0             | 0                   | No                       |
| Mouse 3 - Liver      | 0             | 0                   | -                        |
| Mouse 3 - Spleen     | 0             | 0                   | -                        |
| Mouse 4 - Lung       | 0             | 0                   | No                       |
| Mouse 4 - Liver      | 0             | 0                   | -                        |
| Mouse 4 - Spleen     | 0             | 0                   | -                        |
| Mouse 5 - Lung       | 0             | 0                   | No                       |
| Mouse 5 - Liver      | 0             | 0                   | -                        |
| Mouse 5 - Spleen     | 0             | 0                   | -                        |

\* Histopathology Grading System: 0 = no lesions, 0% of the tissue is affected; 1 = minimal change, 10% and less of the tissue is affected; 2 = mild change, 10-25% of the tissue is affected; 3 = moderate change, 25-50% of the tissue is affected; 4 = marked change, 50-75% of the tissue is affected; 5 = severe change, greater than 75% of the tissue is affected.

\*\* Additional features evaluated: Number of large granulomas (>500 microns); Lobar pneumonia (Yes/No).
